# Supplementary material
Source: PubMed Central journal article supplement (PMC6514635)
Supplement: supp_RA118.006968_142279_2_supp_300955_pvf0ty.pdf [file supp_RA118.006968_142279_2_supp_300955_pvf0ty.pdf]

A small mycobacteriophage–derived peptide and its improved isomer restrict mycobacterial infection via dual mycobactericidal–immunoregulatory activities

**Yang Yang<sup>1,#</sup>, Zhen Liu<sup>1,#</sup>, Xiaoqin He<sup>2,3,#</sup>, Juanjuan Yang<sup>4</sup>, Hailong Yang<sup>5</sup>, Jing Wu<sup>5</sup>, Min Li<sup>1</sup>, Qian Qian<sup>1</sup>, Ren Lai<sup>2,\*</sup>, Wei Xu<sup>1,\*</sup>, Lin Wei<sup>1,\*</sup>**

From the <sup>1</sup>Jiangsu Key Laboratory of Infection and Immunity, Institutes of Biology and Medical Sciences, Soochow University, Suzhou 215123, Jiangsu, China; <sup>2</sup>Key Laboratory of Animal Models and Human Disease Mechanisms, Chinese Academy of Sciences and Yunnan Province, Kunming Institute of Zoology, Kunming 650223, Yunnan, China; <sup>3</sup>National Health Commission Key Laboratory of Parasitic Disease Control and Prevention, Jiangsu Provincial Key Laboratory on Parasite and Vector Control Technology, Jiangsu Institute of Parasitic Diseases, Wuxi 214064, Jiangsu Province, China; <sup>4</sup>Institute of Pharmaceutical Biotechnology and Engineering, College of Biological Science and Technology, Fuzhou University, Fuzhou 350108, Fujian, China; <sup>5</sup>School of Basic Medical Sciences, Kunming Medical University, Kunming 650500, Yunnan, China.

Running Title: *Mycobacteriophage–derived anti–mycobacterial peptides*

### Supplementary tables and table captions

**Table S1. Anti–mycobacterial activities of mycobacteriophage–derived peptides against *M. tuberculosis* H37Rv *in vitro***

| Peptide | Amino acid sequence            | MIC (μg/ml) |
|---------|--------------------------------|-------------|
| RA14    | RRERIEGDRRKEVA                 | >200        |
| RP14    | RRLDRKDYLRRVMP                 | 150         |
| AK15    | AKKKLSRWWRWWVK                 | 37.5        |
| II17    | IEWGNVSRQPKPKATYI              | >200        |
| AQ17    | AAHRAGRPIHDAGVVKQ              | >200        |
| AK18    | ARNVSEENVDRDLAKRWIK            | 150         |
| KY19    | KREMKRPGKGNRNNWKKEY            | >200        |
| RK19    | RLIRVERDSVEALMRPIGK            | >200        |
| RR20    | RPPGFYFEFRANIIPYLGRR           | 150         |
| AK20    | ARRLGMNPWKTPPAKPKGSK           | >200        |
| RE20    | RKPRTTKPKPAPKQEPATEE           | >200        |
| AR21    | ARRRELRARRKRPPERHPGRR          | >200        |
| RH22    | RNRIREMKRPGKGNRNNWKKEH         | >200        |
| RQ23    | RLFGLSIRQHEVMTGHTVKVKSQ        | >200        |
| RN30    | RRMTFDADFELKVAQLNALIAIAELLKEKN | >200        |

MIC: minimal inhibitory concentration. These concentrations represent mean values of three independent experiments performed in duplicates.

**Table S2. Antimicrobial activities of AK15 and its isomer AK15–6 against other Gram–negative, Gram–positive bacteria and fungi *in vitro***

| Microorganisms                      | MIC ( $\mu\text{g/ml}$ ) |        |
|-------------------------------------|--------------------------|--------|
|                                     | AK15                     | AK15–6 |
| Gram–negative bacteria              |                          |        |
| <i>E. coli</i> ATCC 25922           | >200                     | >200   |
| <i>E. coli</i> ATCC 35218           | >200                     | >200   |
| <i>E. coli</i> 13A10022 (CI)        | >200                     | 150    |
| <i>E. coli</i> 08A852 (CI)          | >200                     | >200   |
| <i>P. aeruginosa</i> ATCC27853      | >200                     | >200   |
| <i>P. aeruginosa</i> 08031205 (CI)  | >200                     | >200   |
| <i>A. baumannii</i> ATCC19606       | >200                     | 150    |
| <i>A. baumannii</i> strain 1 (CI)   | >200                     | >200   |
| Gram–positive bacteria              |                          |        |
| <i>S. aureus</i> ATCC 25923         | >200                     | >200   |
| <i>S. aureus</i> ATCC 6538          | >200                     | >200   |
| <i>S. aureus</i> 08A875 (CI)        | >200                     | 150    |
| <i>S. aureus</i> 170805 (CI)        | >200                     | 150    |
| <i>S. aureus</i> 181120 (CI)        | >200                     | 150    |
| <i>S. epidermidis</i> 13A13730 (CI) | >200                     | >200   |
| <i>B. subtilis</i> ATCC 6633        | >200                     | 150    |
| <i>E. faecalis</i> 13U1964 (CI)     | 150                      | 150    |
| Fungi                               |                          |        |
| <i>C. albicans</i> ATCC 10231       | >200                     | >200   |
| <i>C. albicans</i> ATCC 2002        | >200                     | >200   |
| <i>C. albicans</i> 08A802 (CI)      | 150                      | 150    |
| <i>C. albicans</i> 08022710 (CI)    | >200                     | >200   |

MIC: minimal inhibitory concentration. These concentrations represent mean values of three independent experiments performed in duplicates. CI: clinically isolated strain.

**Table S3. Anti–mycobacterial activities of AK15, AK15–6 and other four well–studied small anti–mycobacterial peptides *in vitro***

| Peptide                | Amino acids sequence         | MIC ( $\mu\text{g/ml}$ , $\mu\text{M}$ ) against <i>M. tuberculosis</i> |            |            |            |
|------------------------|------------------------------|-------------------------------------------------------------------------|------------|------------|------------|
|                        |                              | H37Rv                                                                   | WXY        | CAS3       | FXY        |
| AK15                   | AKKKLSRWLRLRWWVK             | 37.5/18.1                                                               | 9.1/18.75  | 75/36.2    | 37.5/18.1  |
| AK15–6                 | AVKKLLRWWSRWK                | 18.75/9.1                                                               | 9.38/4.5   | 18.75/9.1  | 18.75/9.1  |
| Pin2 [14]              | FWGLKGLKKFSSKKL              | 18.75/11.2                                                              | 37.5/22.3  | 18.75/11.2 | 18.75/11.2 |
| Pin2 [17]              | FWGLKGLKGPFGKFSKKL           | 37.5/19.8                                                               | 75/39.7    | 75/39.7    | 37.5/19.8  |
| M(LLKK) <sub>2</sub> M | MLLKLLKKM                    | 150/120.4                                                               | 75/60.2    | 150/120.4  | 75/60.2    |
| IDR–HH2                | VQLRIRVAVIRA–NH <sub>2</sub> | 37.5/26.9                                                               | 18.75/13.5 | 75/53.8    | 37.5/26.9  |

MIC: minimal inhibitory concentration. These concentrations represent mean values of three independent experiments performed in duplicates. *M. tuberculosis* WXY and CAS3 are clinically isolated strains. *M.*

*tuberculosis* FYX is clinically isolated rifampicin-resistant strain with MIC value higher than 32 µg/ml (rifampicin).

**Table S4. Performance comparison of mycobacteriophage-derived anti-mycobacterial peptides and other small cationic anti-mycobacterial peptides**

| Peptide                                | Modifications                                                               | Source                                                 | Mechanism/anti-mycobacterial activity                                                                                                                                                                                                                                                                                                                                                                                                                                                           |
|----------------------------------------|-----------------------------------------------------------------------------|--------------------------------------------------------|-------------------------------------------------------------------------------------------------------------------------------------------------------------------------------------------------------------------------------------------------------------------------------------------------------------------------------------------------------------------------------------------------------------------------------------------------------------------------------------------------|
| AK15 <sup>a</sup>                      | –                                                                           | Derived from mycobacterium phage Che12                 | Direct anti- <i>M. tb</i> activity: TDM-binding, membrane disruption/pore formation<br>Immunomodulatory activity: anti-inflammatory activity and pro-inflammatory activity<br><i>In vitro</i> : MIC(rifampicin-resistant and rifampicin-susceptible <i>M. tb</i> H37Rv, <i>M. tb</i> H37Ra, clinically isolated <i>M. tb</i> and MDR- <i>M. tb</i> ):18.75–75 µg/ml (9.05–36.20 µM)<br><i>In vivo</i> : ( <i>M. tb</i> H37Rv-infected mice): about 63.3% inhibition at 10 mg/kg (4.83 µM, i.v.) |
| AK15-6 <sup>a</sup>                    | Rearrangement of the amino acid residues of the helix of AK15               | Derived from AK15                                      | Direct anti- <i>M. tb</i> activity: TDM-binding, membrane disruption/pore formation<br>Immunomodulatory activity: anti-inflammatory activity and pro-inflammatory activity<br><i>In vitro</i> : MIC(rifampicin-resistant and rifampicin-susceptible <i>M. tb</i> H37Rv, clinically isolated <i>M. tb</i> ):9.38–37.5 µg/ml (4.53–9.05 µM)<br><i>In vivo</i> : ( <i>M. tb</i> H37Rv-infected mice): about 79.5% inhibition at 10 mg/kg (4.83 µM, i.v.)                                           |
| PK34 <sup>a</sup>                      | –                                                                           | Derived from mycobacterium phage D29                   | Direct anti- <i>M. tb</i> activity: TDM-binding<br>Immunomodulatory activity: anti-inflammatory activity<br><i>In vitro</i> : MIC( <i>M. tb</i> H37Rv):50 µg/ml (12.63 µM)<br><i>In vivo</i> : ( <i>M. tb</i> H37Rv-infected mice): about 53.6% inhibition at 10 mg/kg (2.53 µM, i.v.)                                                                                                                                                                                                          |
| 1-C13 <sub>4mer</sub>                  | Tetrameric form; oligo-N-substituted glycines (peptoid) and alkylation      | Design <i>de novo</i>                                  | Direct anti- <i>M. tb</i> activity: Pore formation<br>MIC ( <i>M. tb</i> H37Rv): 6.6 µM                                                                                                                                                                                                                                                                                                                                                                                                         |
| A18G5, A24C1ac, A29C5FA, and A38A1guan | D-enantiomer, alkylation, tetramethylguanidination, and polyethylene glycol | Derived from the insect proline-rich peptide Apidaecin | Direct anti- <i>M. tb</i> activity: bacterial membrane permeation/inhibition of protein synthesis<br>MIC: not obtained                                                                                                                                                                                                                                                                                                                                                                          |

|                                             |                                     | conjugation                                                                     |                                                                                                                                                                                                                                                                                                                                                                                    |
|---------------------------------------------|-------------------------------------|---------------------------------------------------------------------------------|------------------------------------------------------------------------------------------------------------------------------------------------------------------------------------------------------------------------------------------------------------------------------------------------------------------------------------------------------------------------------------|
| CAMP/PLD                                    | –                                   | Short cationic peptides (10 AA) rich in W and R selected from peptide libraries | Direct anti- <i>M. tb</i> activity: pore formation<br>MIC ( <i>M. tb</i> H37Rv): 1.1–141 $\mu$ M                                                                                                                                                                                                                                                                                   |
| CP26                                        | –                                   | Derived from cecropin A: mellitin                                               | Direct anti- <i>M. tb</i> activity: cell wall disruption<br>MIC ( <i>M. tb</i> H37Rv): 2 $\mu$ g/ml (0.70 $\mu$ M)                                                                                                                                                                                                                                                                 |
| D-LAK 120                                   | D-enantiomer                        | Synthetic $\alpha$ -helical peptides                                            | Direct anti- <i>M. tb</i> activity: pore-formation/Inhibition of protein synthesis<br>MIC ( <i>M. tb</i> H37Rv): not determined                                                                                                                                                                                                                                                    |
| D-LL37                                      | D-enantiomer                        | Derived from LL-37                                                              | Direct anti- <i>M. tb</i> activity: pore-formation<br>Immunomodulatory activity<br><i>In vitro</i> : MIC( <i>M. tb</i> H37Rv): 100 $\mu$ g/ml (22.26 $\mu$ M)                                                                                                                                                                                                                      |
| E2 and E6                                   | –                                   | Derived from batenecin (bovine cathelicidin) Bac8c (8 AA)                       | Direct anti- <i>M. tb</i> activity: cell wall disruption<br>MIC ( <i>M. tb</i> H37Rv): 2.6–3.2 $\mu$ g/ml (1.92–2.20 $\mu$ M)                                                                                                                                                                                                                                                      |
| HHC-10                                      | –                                   | Derived from batenecin                                                          | Direct anti- <i>M. tb</i> activity<br>MIC ( <i>M. bovis</i> BCG): not determined                                                                                                                                                                                                                                                                                                   |
| hLFcin1-11/<br>hLFcin17-3<br>0              | D-enantiomer                        | Derived from lactoferricin (All-R and All-K substitutions)                      | Direct anti- <i>M. tb</i> activity: bacterial cell wall and membrane lysis<br>IC90 ( <i>M. avium</i> ): 15–30 $\mu$ M                                                                                                                                                                                                                                                              |
| IDR-1002,<br>-HH2,<br>IDR-1018 <sup>a</sup> | –                                   | Derived from macrophage chemotactic protein-1 (MCP-1)                           | Direct anti- <i>M. tb</i> activity: mechanism not determined<br>Immunomodulatory activity: anti-inflammatory activity<br>MIC ( <i>M. tb</i> H37Rv): 16–29.3 $\mu$ g/ml (10.42–21.03 $\mu$ M)<br><i>In vivo</i> : [Mtb H37Rv and multidrug resistant TB strain (MDR-TB) infected mice]: 10–71% killing at 32 $\mu$ g/mouse (3 $\times$ week intra-tracheal administration, 30 days) |
| LLAP                                        | Hyaluronic acid nanogel conjugation | Derived from LL-37                                                              | Direct anti- <i>M. tb</i> activity: inhibition of ATPase<br>MIC ( <i>M. smegmatis</i> mc <sup>2</sup> 155): 600 $\mu$ g/ml (357.33 $\mu$ M)                                                                                                                                                                                                                                        |
| LLKKK18 <sup>a</sup>                        | Hyaluronic acid nanogel conjugation | Derived from LL-37                                                              | Direct anti- <i>M. tb</i> activity: pore formation<br>Immunomodulatory activity<br><i>In vivo</i> ( <i>M. tb</i> H37Rv-infected mice): 1.2-log reduction at 100 $\mu$ M (10 intra-tracheal administrations)                                                                                                                                                                        |

|                                                       |                                                                                                          |                                                 |                                                                                                                                                                                                                                                                                                  |
|-------------------------------------------------------|----------------------------------------------------------------------------------------------------------|-------------------------------------------------|--------------------------------------------------------------------------------------------------------------------------------------------------------------------------------------------------------------------------------------------------------------------------------------------------|
| MIAP                                                  | –                                                                                                        | Derived from Magainin-I                         | Direct anti- <i>M. tb</i> activity: inhibition of ATPase<br>MIC ( <i>M. tb</i> H37Ra): 300 µg/ml (191.58 µM)                                                                                                                                                                                     |
| Pin2 variants                                         | –                                                                                                        | Derived from pandinin2 (short helical peptides) | Direct anti- <i>M. tb</i> activity: membrane disruption<br>MIC ( <i>M. tb</i> H37Rv and MDR- <i>M. tb</i> ): 6–33 µM                                                                                                                                                                             |
| RN3(1–45)<br>RN6(1–45)<br>RN7(1–45)                   | –                                                                                                        | Derived from human RNases N-terminus            | Bacterial cell wall disruption/cell agglutination and intracellular macrophage killing<br><i>In vitro</i> : MIC ( <i>M. vaccae</i> ; <i>M. aurum</i> ; <i>M. smegmatis</i> mc <sup>2</sup> 155; <i>M bovis</i> BCG)<br><i>In vivo</i> : 10–20 µM and <i>ex vivo</i> ( <i>M. aurum</i> ): 5–10 µM |
| Synthetic AMPs (SAMPs-Dma)                            | Dimethylamination and imidazolization                                                                    | Design <i>de novo</i>                           | Direct anti- <i>M. tb</i> activity: cell penetration and DNA binding<br>synthetic antimicrobial peptide-Dma10: MIC ( <i>M. smegmatis</i> mc <sup>2</sup> 155): <20 µM                                                                                                                            |
| X(LLKK)<br>2X:II-D,<br>II-Orn,<br>IIDab, and<br>IIDap | Peptide<br>D-enantiomer, ornithination, 2,4-diaminobutyric acidation, and 2,3-diaminopropionic acidation | Short stabilized –helical amphipatic peptides   | Direct anti- <i>M. tb</i> activity: pore formation<br>M(LLKK)2M: MIC ( <i>M. smegmatis</i> mc <sup>2</sup> 155, <i>M. tb</i> H37Rv): 62.5–125 µg/ml (50.21–100.42 µM)<br>I(LLKK) <sub>2</sub> I: effective against MDR-TB                                                                        |

<sup>a</sup>These peptides also showed anti-mycobacterial activities against *M. tb in vivo* using murine infection models. MIC: minimal inhibitory concentration.

## Supplementary figures and figure legends

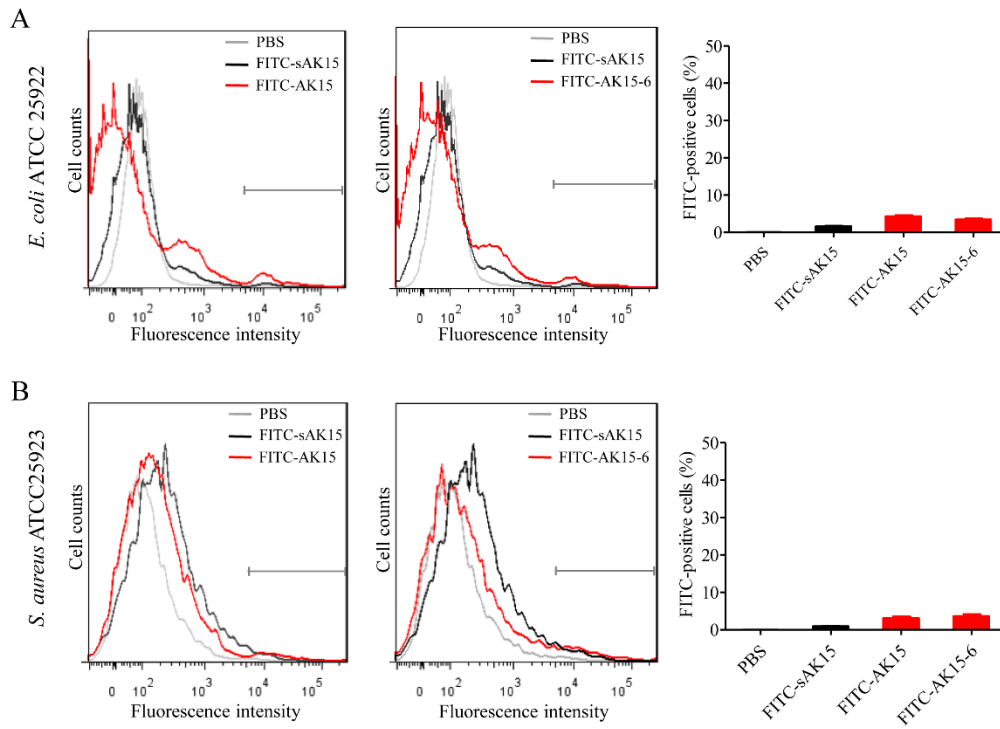

**Figure S1. AK15 and its isomer AK15-6 showed weak binding capacity to *E. coli* (A) and *S. aureus* (B) as compared to *M. tb*.** Bacteria were washed twice with PBS and exposed to FITC-labeled AK15 or AK15-6 (1  $\mu\text{g/ml}$ ) at 37  $^{\circ}\text{C}$ . PBS and FITC-labeled sAK15 were used as control, respectively. After incubation for 5 min, bacteria were washed twice with PBS, assayed on a FACS calibur flow cytometer and analyzed by Cell Quest software (BD Immunocytometry). Results are represented as mean  $\pm$  SEM of three independent experiments.

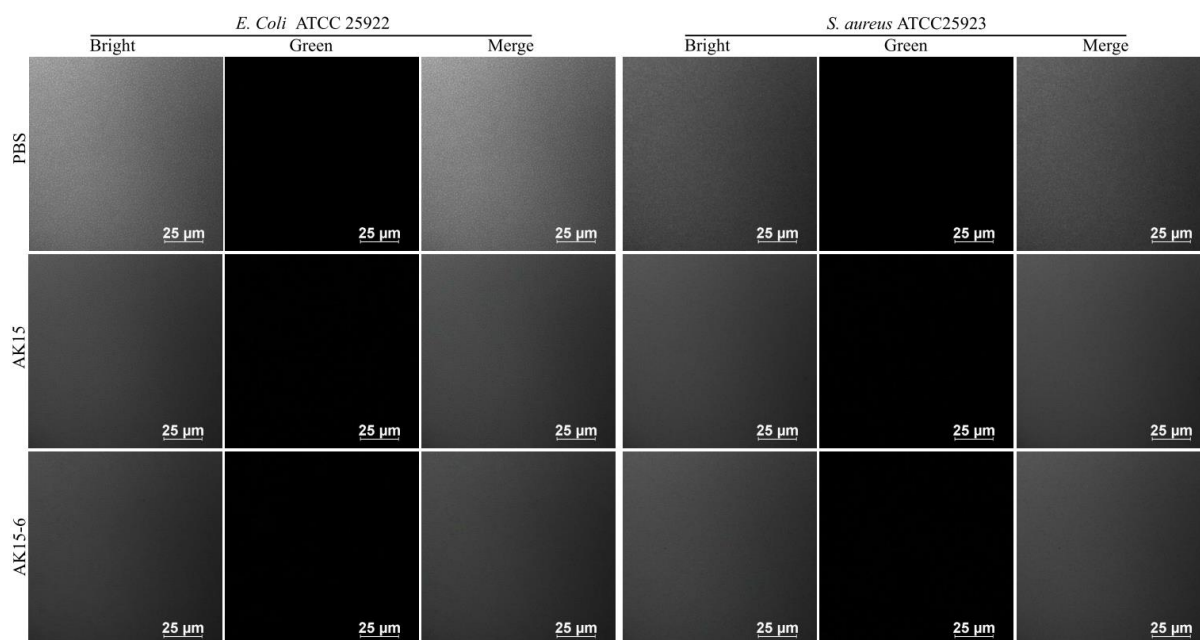

**Figure S2. AK15 and its isomer AK15-6 showed no significant membrane-permeating capacity to *E. coli* and *S. aureus*.** Bacteria were washed twice with PBS and exposed to FITC-labeled AK15 or AK15-6 (1 µg/ml) at 37 °C. PBS and FITC-labeled sAK15 were used as control, respectively. After incubation for 5 min, Bacteria were washed twice with PBS, assayed on a FACS caliber flow cytometer and analyzed by Cell Quest software (BD Immunocytometry).

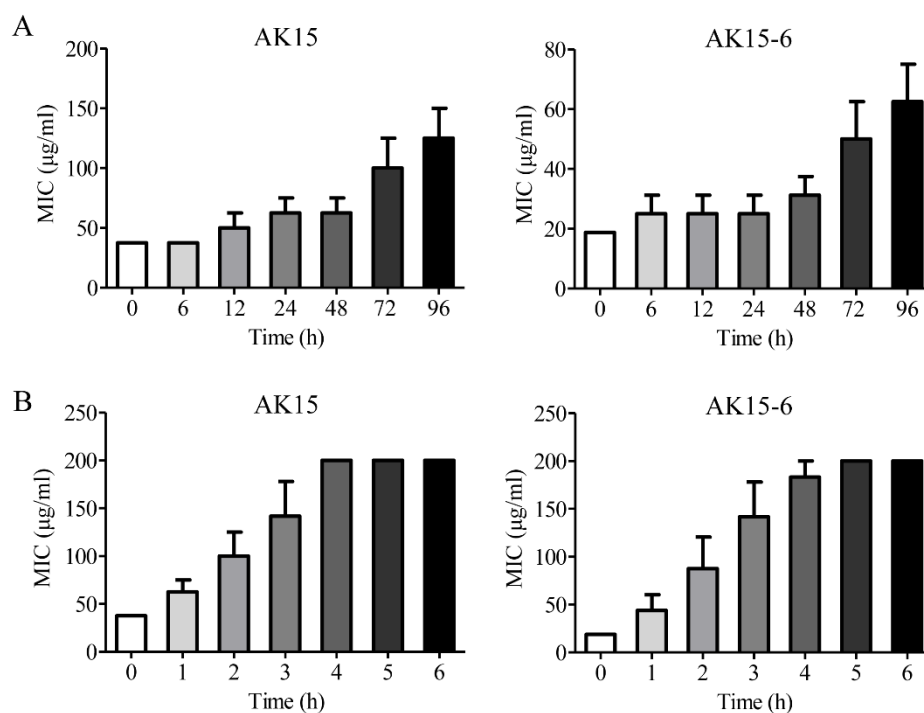

**Figure S3. Stability of AK15 and its isomer AK15–6.** (A) Thermal stability. Peptide solution (2 mg/ml) was incubated at 37 °C for 0, 6, 12, 24, 48, 72 and 96 h. After incubation, thermal stability of the peptide was evaluated by detection the MIC value of the peptide against *M. tuberculosis* H37Rv. (B) Serum stability. Peptide solution (10 mg/ml) was mixed with human serum at a volume ratio of 1:4 to reach a final concentration of 2 mg/ml, and incubated at 37 °C for 0–6 h. After incubation, serum stability of the peptide was evaluated by determination of the MIC value of the peptide against *M. tuberculosis* H37Rv.

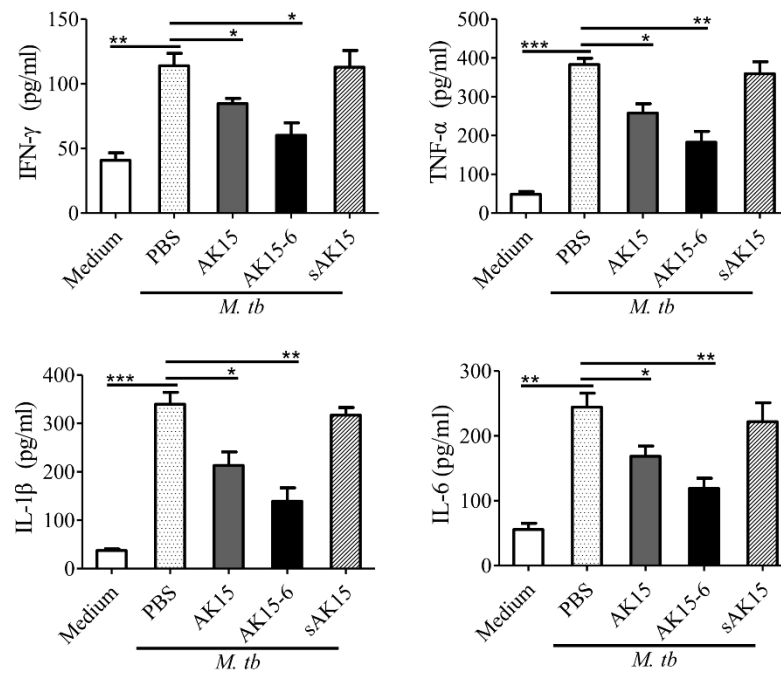

**Figure S4. AK15 and its isomer AK15–6 attenuated the pro-inflammatory cytokine production in *M. tb*-infected murine BMDMs.** BMDMs ( $1 \times 10^5$ /well) were infected or not with *M. tuberculosis* H37Rv (M.O.I. = 2) and further incubated in the presence of peptide (20  $\mu$ g/ml) or an equal volume of PBS. After incubation for 72 h, supernatants were harvested for determination of cytokine levels by ELISA. \* $P < 0.05$ , \*\* $P < 0.01$ , \*\*\* $P < 0.001$ .



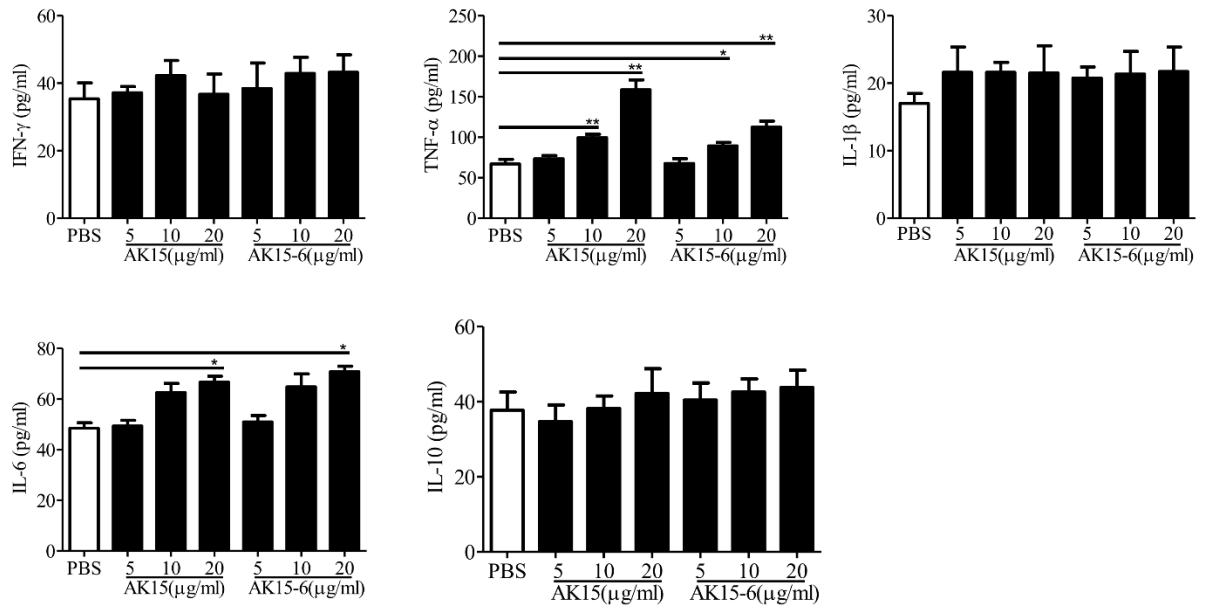

**Figure S5. AK15 and its isomer AK15-6 elicited modest levels of TNF- $\alpha$  and IL-6 production in murine BMDMs.** BMDMs ( $2.5 \times 10^5$ /well, 24-well culture plate) were incubated with peptide (20  $\mu$ g/ml) or an equal volume of PBS in RPMI-1640 (2% FBS). After incubation for 24 h, cytokine levels in the supernatant were measured by ELISA.

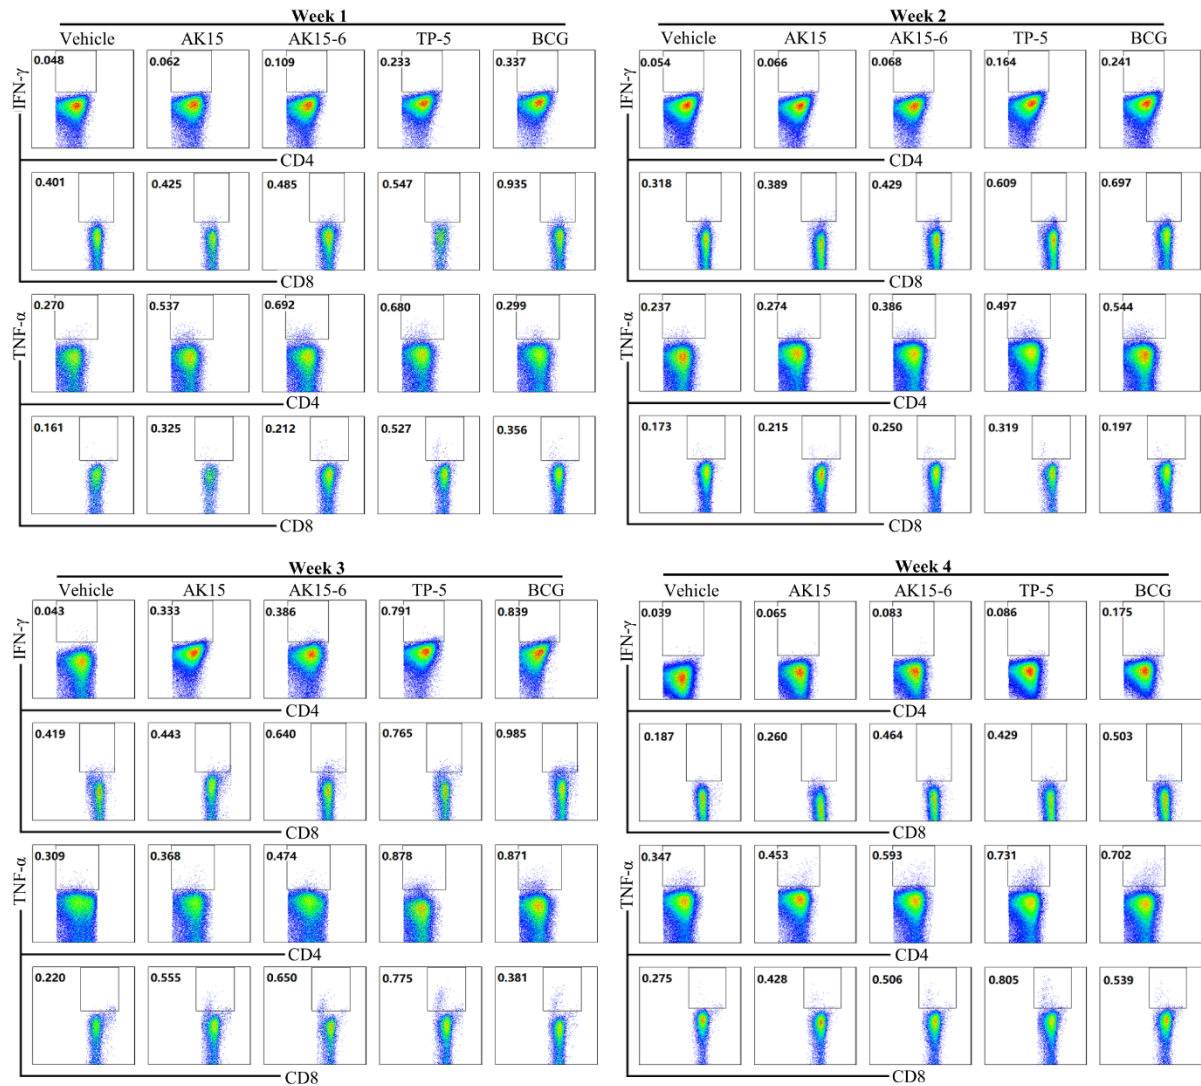

**Figure S6. AK15 and its isomer AK15-6 enhanced IFN- $\gamma$ /TNF- $\alpha$ -secreting CD4<sup>+</sup> and CD8<sup>+</sup> T cell responses in the lung.** The frequency of CD4<sup>+</sup> and CD8<sup>+</sup> T cells in the lung producing IFN- $\gamma$  and TNF- $\alpha$  in response to AK15, AK15-6, TP-5 (thymopentin, peptide control, a clinically used immunomodulatory peptide) or BCG (positive control). Numbers in each quadrant represent percentages of IFN- $\gamma$  or TNF- $\alpha$ -positive cells in CD4<sup>+</sup> or CD8<sup>+</sup> T population. BALB/c mice were injected with peptide (10 mg/kg, dissolved in PBS, i.v.) once a day at week 1. Control mice received the same volume of vehicle (PBS), *M. bovis* BCG (10<sup>6</sup> CFU/mouse) or TP-5 (10 mg/kg). Mice were sacrificed at week 1, 2, 3 and 4, respectively. Pulmonary lymphocytes were isolated, intracellularly stained with FITC-IFN- $\gamma$  and APC-TNF- $\alpha$  antibody, and assayed by flow cytometry. \* $P < 0.05$ , \*\* $P < 0.01$ , \*\*\* $P < 0.001$ .

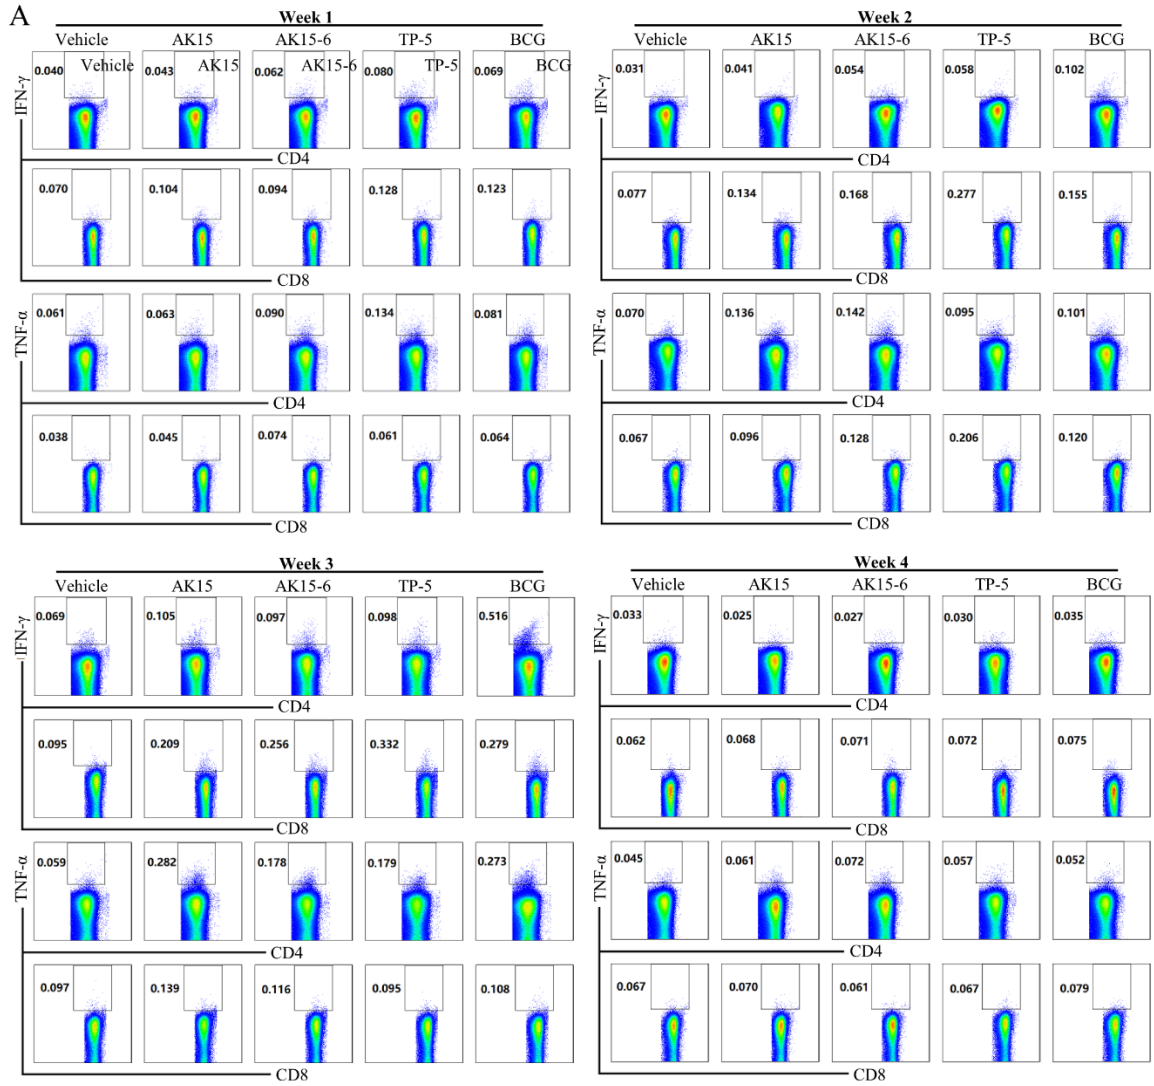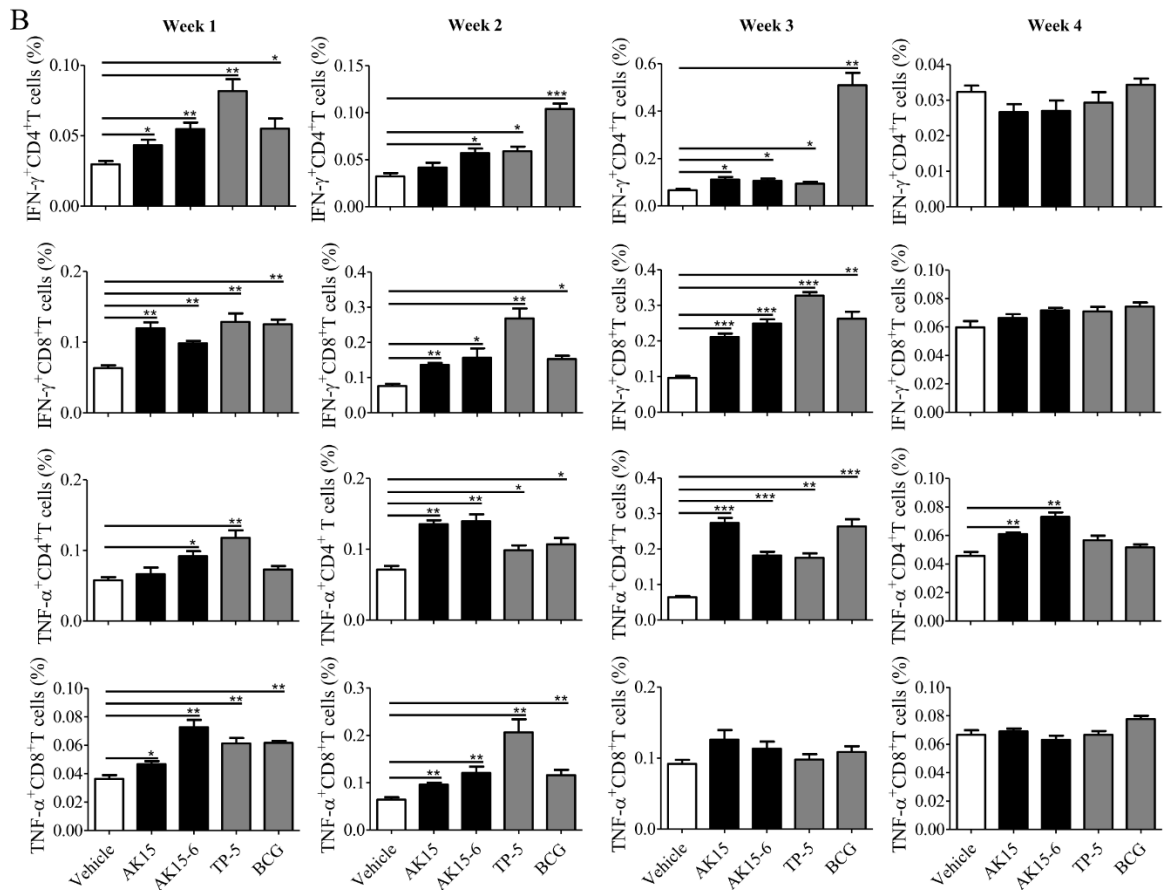

**Figure S7. AK15 and its isomer AK15-6 enhanced IFN- $\gamma$ /TNF- $\alpha$ -secreting CD4<sup>+</sup> and CD8<sup>+</sup> T cell responses in the spleen.** (A) The frequency of CD4<sup>+</sup> and CD8<sup>+</sup> T cells in the spleen producing IFN- $\gamma$  and TNF- $\alpha$  in response to AK15, AK15-6, TP-5 (thymopentin, peptide control, a clinically used immunomodulatory peptide) or BCG (positive control). Numbers in each quadrant represent percentages of IFN- $\gamma$  or TNF- $\alpha$ -positive cells in CD4<sup>+</sup> or CD8<sup>+</sup> T population (B) Statistical analysis of the frequency of IFN- $\gamma$  or TNF- $\alpha$ -secreting CD4<sup>+</sup> and CD8<sup>+</sup> T cells. BALB/c mice were injected with peptide (10 mg/kg, dissolved in PBS, i.v.) once a day at week 1. Control mice received the same volume of vehicle (PBS), *M. bovis* BCG (10<sup>6</sup> CFU/mouse) or TP-5 (10 mg/kg). Mice were sacrificed at week 1, 2, 3 and 4, respectively. Splenocytes were isolated, intracellularly stained with FITC-IFN- $\gamma$  and APC-TNF- $\alpha$  antibody, and assayed by flow cytometry. \**P* < 0.05, \*\**P* < 0.01, \*\*\**P* < 0.001.

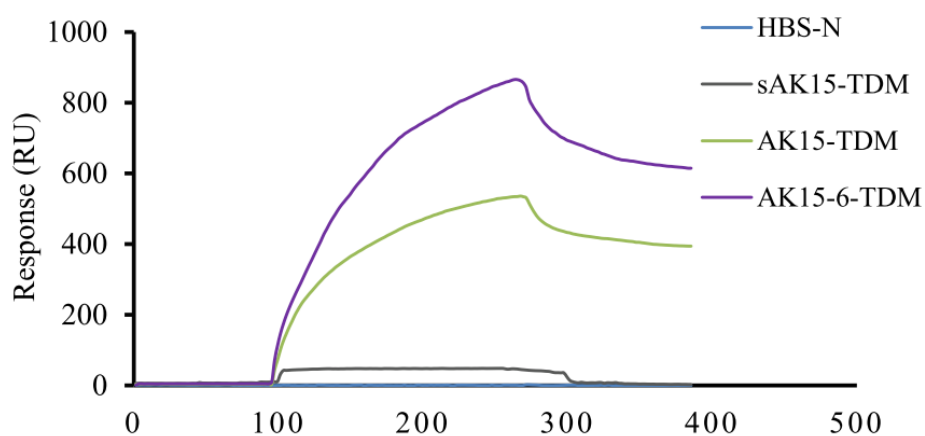

**Figure S8. Analysis of the binding specificity of TDM to the peptides.** Interaction between peptide (AK15, AK15-6, scrambled AK15: sAK15) and TDM were determined by surface plasma resonance. Peptide was immobilized on a CM5 sensor chip as ligand, and TDM was diluted in HBS-N buffer. Response (resonance units, RU) are recorded for 40 nM TDM.
